# Supplementary material
Source: PubMed Central journal article supplement (PMC3682215)

## SUPPORTING INFORMATION

**Figure S1:** 12% reducing SDS-PAGE showing purity of enzymes used in this study. Lane 1: TriChromRanger™ prestained protein molecular weight marker mix, Lot:IE0014 (Pierce, Rockford, IL), Lane 2: HisCeTR2, Lane 3: HiscCeTR2 $\Delta$ 8, Lane 4: DmTR, Lane 5: DmTR $\Delta$ 8, Lane 6: semi-synthetic mTR3, Lane 7: mTR3 $\Delta$ 8.

**Figure S2:** Activity toward disulfide substrates as a function of pH for yeast glutathione reductase. **A)** DTNB (closed triangles). **B)** Acyclic PTPASC-TNB peptide (open triangles). **C)** Superimposition of the data in plots **A** and **B**. **D)** For comparison purposes, we show the data from Figure 3A superimposed with the plot of GR using DTNB as a substrate. Truncated mTR3 $\Delta$ 8 (closed squares), truncated DmTR $\Delta$ 8 (open circles) and yeast GR (closed triangles). Results are reported as a percentage of the maximal activity for each plot.

**Table S1: Activity of Truncated and Full-length TRs as a Function of pH.**

| pH   | Activity (mol TNB <sup>-</sup> /min/mol TR) |                |           |                 |
|------|---------------------------------------------|----------------|-----------|-----------------|
|      | mTR-GCUG                                    | mTR $\Delta$ 8 | DmTR-SCCS | DmTR $\Delta$ 8 |
| 5.0  | 8.88                                        | 8.58           | -         | -               |
| 5.5  | 32.48                                       | 70.62          | 10.72     | -               |
| 6.0  | 422.49                                      | 935.87         | 48.41     | 259.80          |
| 6.5  | 945.16                                      | 1570.7         | 189.34    | 612.00          |
| 7.0  | 1056.7                                      | 1409.7         | 216.30    | 797.00          |
| 7.5  | 1062.2                                      | 1149.1         | 226.41    | 974.00          |
| 8.0  | 849.88                                      | 810.05         | 233.46    | 900.25          |
| 8.5  | 733.15                                      | 383.17         | 246.63    | 800.00          |
| 9.0  | 617.03                                      | 330.47         | 205.58    | 570.83          |
| 9.5  | 481.62                                      | -              | 168.50    | 313.73          |
| 10.0 | 368.57                                      | -              | 98.65     | 123.00          |

**Table S2:** Concentration of Truncated TR and Peptide used in Peptide Complementation Experiments.

| Peptide            | Concentration Range | Enzyme            | Concentration |
|--------------------|---------------------|-------------------|---------------|
| Cyclic PTVTGCUG    | 0-20.0mM            | mTR3- $\Delta$ 8  | 3nM           |
| Acyclic PTVTGCUG   | 0-7.5mM             | mTR3- $\Delta$ 8  | 50nM          |
| Cyclic PTVTGCCG    | 0-20.0mM            | mTR3- $\Delta$ 8  | 2000nM        |
| Acyclic PTVTGCCG   | 0-20.0mM            | mTR3- $\Delta$ 8  | 2000nM        |
| Cyclic PTVTGUUG    | 0-7.5mM             | mTR3- $\Delta$ 8  | 1000nM        |
| Acyclic PTVTGC-TNB | 0-2.0mM             | mTR3- $\Delta$ 8  | 15nM          |
| Cyclic PTPASCCS    | 0-25.0mM            | DmTR- $\Delta$ 8  | 25nM          |
| Acyclic PTPASCCS   | 0-20.0mM            | DmTR- $\Delta$ 8  | 2000nM        |
| Cyclic PTPASCUS    | 0-1.0mM             | DmTR- $\Delta$ 8  | 5nM           |
| Acyclic PTPASCUS   | 0-10.0mM            | DmTR- $\Delta$ 8  | 50nM          |
| Cyclic PTPASUCS    | 0-10.0mM            | DmTR- $\Delta$ 8  | 500nM         |
| Acyclic PTPASC-TNB | 0-5.0mM             | DmTR- $\Delta$ 8  | 50nM          |
| Cyclic PRTQGCG     | 0-11.0mM            | CeTR2- $\Delta$ 8 | 20nM          |
| Acyclic PRTQGCG    | 0-10.0mM            | CeTR2- $\Delta$ 8 | 2000nM        |
| Cyclic PRTQGCUG    | 0-10.0mM            | CeTR2- $\Delta$ 8 | 60nM          |
| Acyclic PRTQGCUG   | 0-10.0mM            | CeTR2- $\Delta$ 8 | 60nM          |
| Cyclic PRTQGC-TNB  | 0-10.0mM            | CeTR2- $\Delta$ 8 | 20nM          |

Figure S1

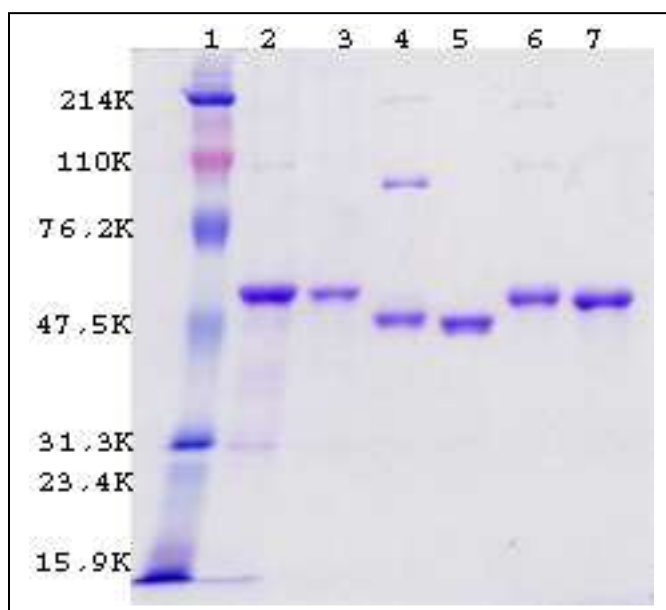

Figure S2

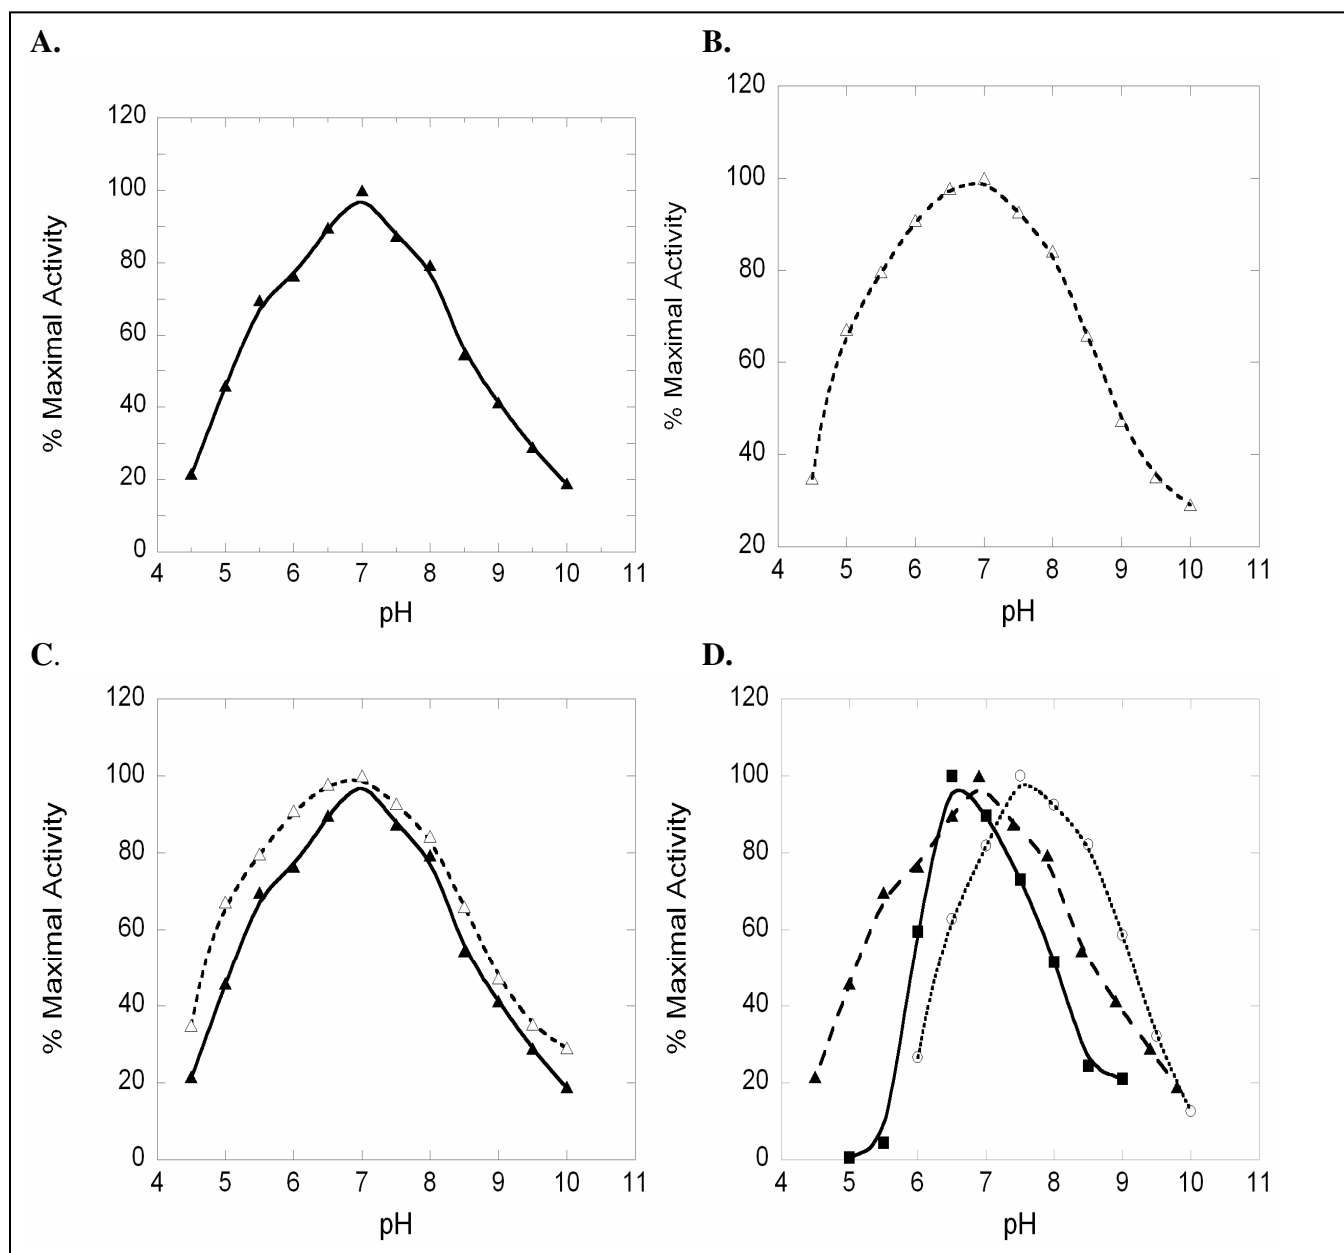

Supplement: NIHMS91158-supplement-1_si_001.pdf [file NIHMS91158-supplement-1_si_001.pdf]
